# Supplementary material for: Trichoderma atroviride hyphal regeneration and conidiation depend on cell-signaling processes regulated by a microRNA-like RNA
Source: PubMed Central journal article supplement — Microb Genom. 2022 Oct 14;8(10):mgen000869. doi: 10.1099/mgen.0.000869 (PMC9676055; doi:10.1099/mgen.0.000869), 2022-10-14
Supplement: mgen-8-869-s001.pdf [file mgen-8-869-s001.pdf]

***Trichoderma atroviride* hyphal regeneration and conidiation depend on cell signaling process regulated by a microRNA-like RNA**

José M. Villalobos-Escobedo, J. Pedro Martínez-Hernández, Ramón Pelagio-Flores<sup>1</sup>, Pablo M. González De la Rosa<sup>2</sup>, Nohemí Carreras-Villaseñor, Cei L. Abreu-Goodger<sup>3,\*</sup> and Alfredo Herrera-Estrella\*.

**Supplementary Information**

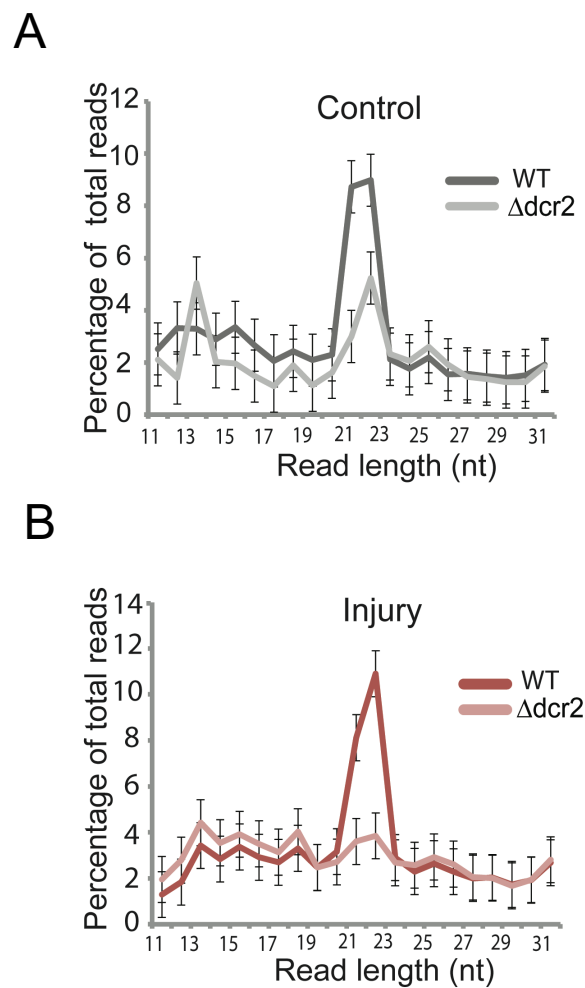

**Figure S1.** Percentage of total reads of small RNAs of different sizes, both in the control (A) and in response to injury (B), for the  $\Delta dcr2$  mutant and the WT strain.

Conting\_23: miRNA4

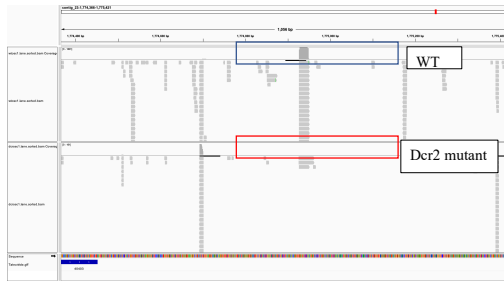

Conting\_20: miRNA5

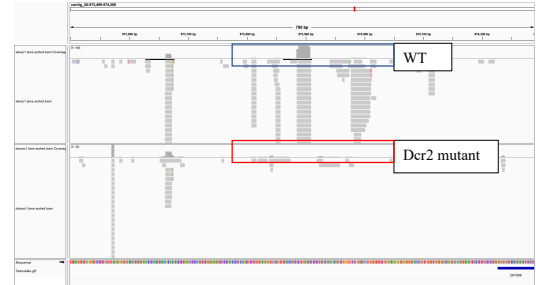

**Figure S2. Accumulation of reads on the miRNA4 and miRNA5.** This image shows the reads from small RNA for the regions that code for miRNA4 and 5. In both cases, only one reads accumulation peak of accumulated reads is evident for the WT strain, with no accumulation of reads not being able to observe reads accumulation in the 5P region (highlighted in blue box). In the  $\Delta dcr2$  mutant, at this scale, it is not possible to observe reads (highlighted in red box).

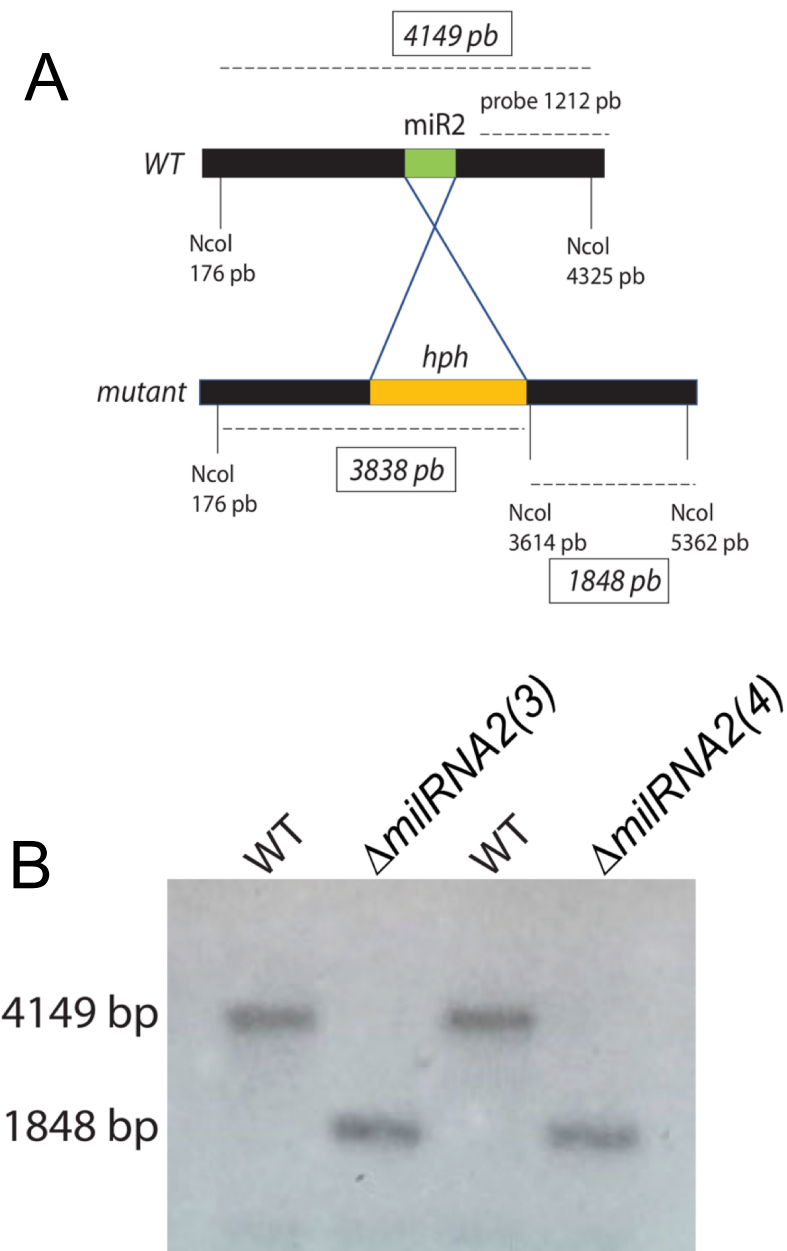

**Figure S3. Confirmation of the mutation of the milRNA2 by Southern blot.** A) Restriction map pattern with the NcoI enzyme. The 3' fragment of the construct was used as a probe. B) Restriction pattern obtained for the WT strain and mutants  $\Delta$ milRNA2-3 and  $\Delta$ milRNA2-4.

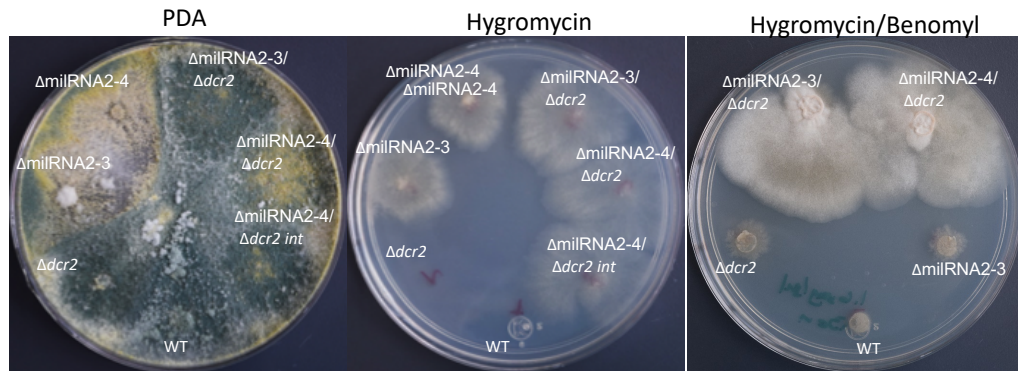

**Figure S4. Growth assay of *milRNA2* mutants and heterokaryon colonies.** The image shows the growth of the mutant strains in PDA, hygromycin, and the combination of hygromycin with benomyl, demonstrating that the fused strains form heterokaryon colonies that are capable of resisting both antibiotics.

contig\_17:1121016-1121375

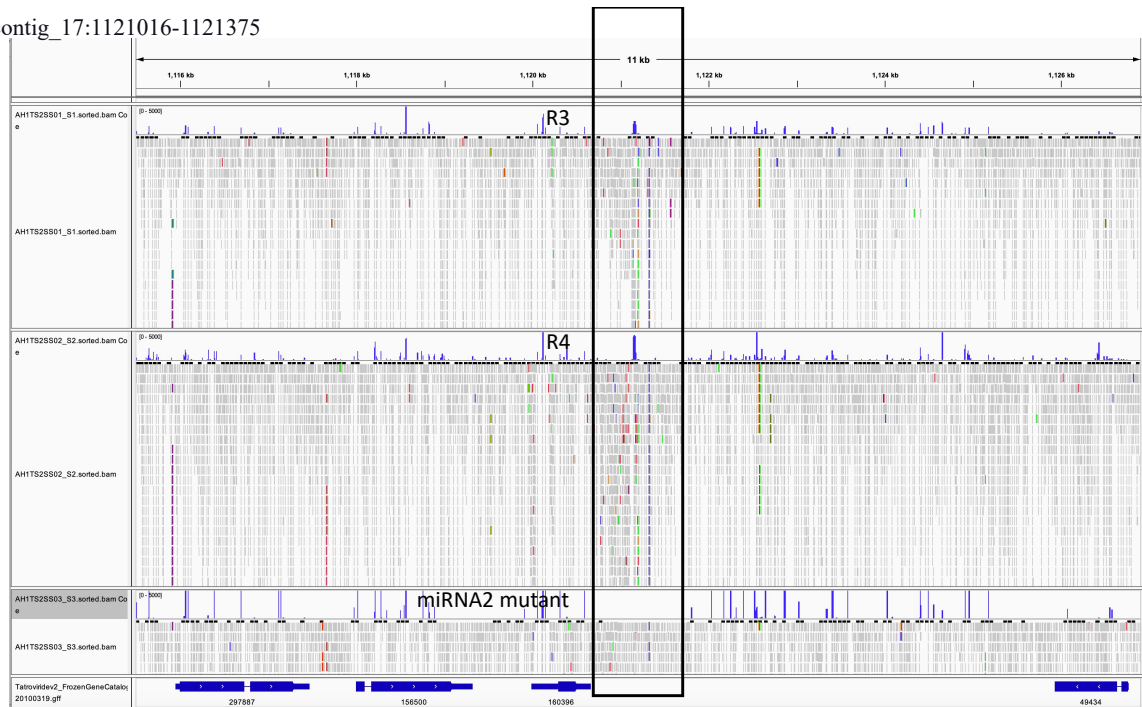

**Figure S5. Accumulation of sRNA reads on the genomic region encoding milRNA2.**

This image shows the sRNA accumulation profile of the  $\Delta$ milRNA2-3 mutant and two of the fusion complements (R3 and R4), where the recovery of milRNA2 can be seen (image generated in IGV). The tracks blue ones above the line show the reads accumulation for all strains.

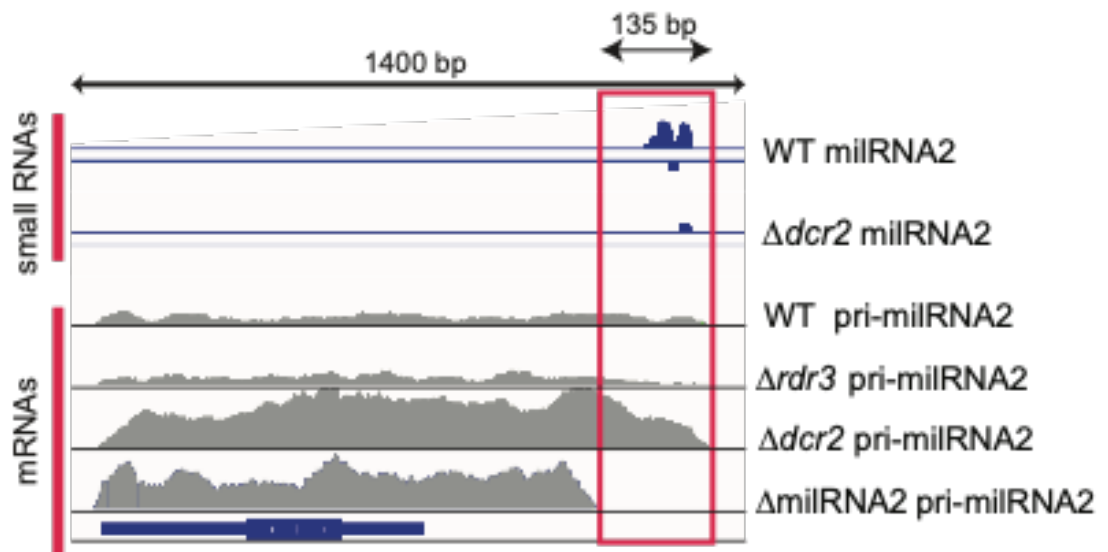

**Figure S6. Accumulation of reads on the pri-milRNA2 region.** This image shows the reads from small RNA and messenger RNA libraries in the WT,  $\Delta dcr2$ ,  $\Delta rdr3$  and  $\Delta milRNA2$  strains.

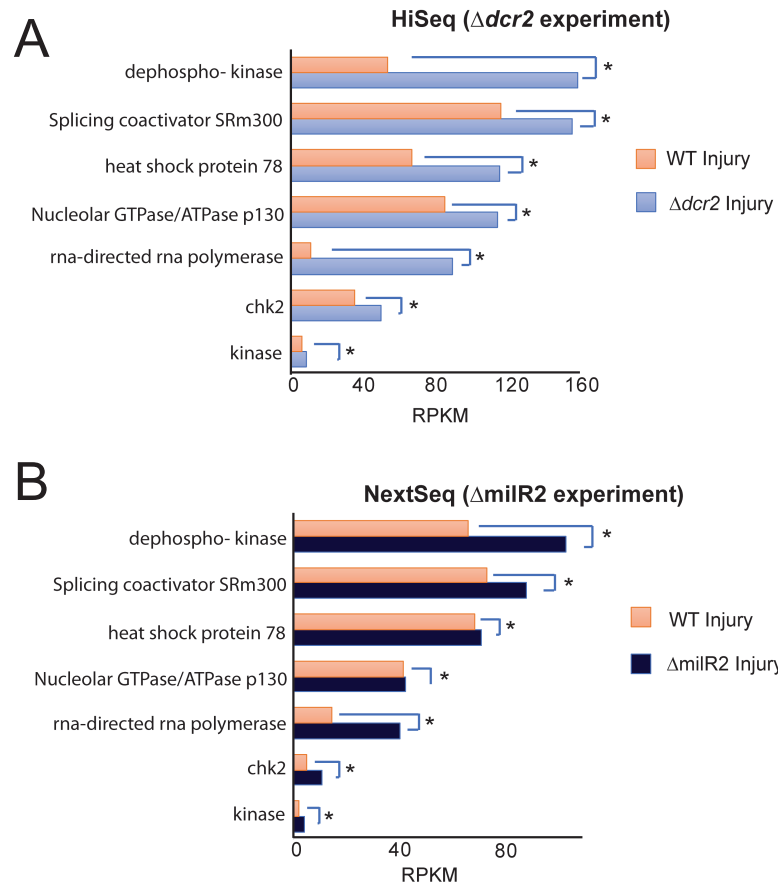

**Figure S7. Target genes predicted by TargetFinder.** Expression profile of milRNA2-target genes affected by both the mutation of milRNA2 and the *dcr2* gene. These values are expressed in counts per million, given that they were independent sequencing experiments for each strain, the HiSeq (A) and NextSeq (B) data are presented.

**Table S1.** Sequencing statistics. The table shows the sequencing and alignment statistics for each of the RNAseq libraries used in this work.

| RNA-seq of response to injury in mutant background dcr2 (HiSeq Illumina)      |           |                 |               |                     |                 |      |             |
|-------------------------------------------------------------------------------|-----------|-----------------|---------------|---------------------|-----------------|------|-------------|
| Library                                                                       | Condition | Strain          | Raw reads     | Reads pseudoaligned | % pseudoaligned | % GC | Length (nt) |
| WT_C_R1                                                                       | control   | Wild-type       | 18,423,897    | 14,982,726          | 81.32           | 51   | 100         |
| WT_C_R2                                                                       | control   | Wild-type       | 18,378,557    | 14,849,752          | 80.80           | 53   | 100         |
| WT_C_R3                                                                       | control   | Wild-type       | 22,663,385    | 18,033,711          | 79.57           | 53   | 100         |
| WT_I_R1                                                                       | Injury    | Wild-type       | 16,592,949    | 13,297,645          | 80.14           | 53   | 100         |
| WT_I_R2                                                                       | Injury    | Wild-type       | 13,233,037    | 10,210,180          | 77.16           | 53   | 100         |
| WT_I_R3                                                                       | Injury    | Wild-type       | 17,607,149    | 14,025,959          | 79.66           | 53   | 100         |
| dcr2_C_R1                                                                     | control   | dcr2 knockout   | 15,697,790    | 12,488,496          | 79.56           | 53   | 100         |
| dcr2_C_R2                                                                     | control   | dcr2 knockout   | 12,048,181    | 9,728,939           | 80.75           | 53   | 100         |
| dcr2_C_R3                                                                     | control   | dcr2 knockout   | 13,561,726    | 10,942,754          | 80.69           | 53   | 100         |
| dcr2_I_R1                                                                     | Injury    | dcr2 knockout   | 22,530,567    | 18,136,146          | 80.50           | 53   | 100         |
| dcr2_I_R2                                                                     | Injury    | dcr2 knockout   | 15,428,457    | 12,373,228          | 80.20           | 52   | 100         |
| dcr2_I_R3                                                                     | Injury    | dcr2 knockout   | 19,599,252    | 15,663,456          | 79.92           | 53   | 100         |
|                                                                               |           | <b>Total</b>    | 205,764,947   | 164,732,992         |                 |      |             |
|                                                                               |           | <b>Average</b>  | 17,147,078.92 | 13,727,749.33       |                 |      |             |
| RNA-seq of response to injury in mutant background rdr3 (Next-seq Illumina)   |           |                 |               |                     |                 |      |             |
| Library                                                                       | Condition | Strain          | Raw reads     | Reads pseudoaligned | % pseudoaligned | % GC | Length (nt) |
| WT_C_R1                                                                       | control   | Wild-type       | 21,770,455    | 18,073,692          | 83.02           | 52   | 75          |
| WT_C_R2                                                                       | control   | Wild-type       | 15,586,542    | 11,974,338          | 76.82           | 53   | 75          |
| WT_C_R3                                                                       | control   | Wild-type       | 15,799,760    | 12,122,701          | 76.73           | 53   | 75          |
| WT_I_R1                                                                       | Injury    | Wild-type       | 27,464,653    | 20,747,559          | 75.54           | 54   | 75          |
| WT_I_R2                                                                       | Injury    | Wild-type       | 30,713,438    | 24,060,680          | 78.34           | 54   | 75          |
| WT_I_R3                                                                       | Injury    | Wild-type       | 26,074,913    | 20,351,200          | 78.05           | 54   | 75          |
| rdr3_C_R1                                                                     | control   | rdr3 knockout   | 34,159,269    | 27,133,935          | 79.43           | 54   | 75          |
| rdr3_C_R2                                                                     | control   | rdr3 knockout   | 31,517,655    | 25,472,292          | 80.82           | 53   | 75          |
| rdr3_C_R3                                                                     | control   | rdr3 knockout   | 38,211,870    | 29,894,130          | 78.23           | 54   | 75          |
| rdr3_I_R1                                                                     | Injury    | rdr3 knockout   | 28,430,497    | 22,066,817          | 77.62           | 54   | 75          |
| rdr3_I_R2                                                                     | Injury    | rdr3 knockout   | 29,798,021    | 23,249,992          | 78.03           | 53   | 75          |
| rdr3_I_R3                                                                     | Injury    | rdr3 knockout   | 28,132,833    | 21,798,483          | 77.48           | 54   | 75          |
|                                                                               |           | <b>Total</b>    | 327,659,906   | 256,945,819         |                 |      |             |
|                                                                               |           | <b>Average</b>  | 27,304,992.17 | 21,412,151.58       |                 |      |             |
| RNA-seq of response to injury in mutant background miRNA2 (Next-seq Illumina) |           |                 |               |                     |                 |      |             |
| Library                                                                       | Condition | Strain          | Raw reads     | Reads pseudoaligned | % pseudoaligned | % GC | Length (nt) |
| WT_I_R1                                                                       | Injury    | Wild-type       | 20,034,470    | 15,727,836          | 78.50           | 53   | 75          |
| WT_I_R2                                                                       | Injury    | Wild-type       | 16,752,131    | 13,749,236          | 82.07           | 53   | 75          |
| WT_I_R3                                                                       | Injury    | Wild-type       | 15,511,765    | 12,459,576          | 80.32           | 53   | 75          |
| miRNA2_I_R1                                                                   | Injury    | miRNA2 knockout | 18,775,876    | 15,098,128          | 80.41           | 53   | 75          |
| miRNA2_I_R2                                                                   | Injury    | miRNA2 knockout | 14,118,813    | 11,478,018          | 81.30           | 52   | 75          |
| miRNA2_I_R3                                                                   | Injury    | miRNA2 knockout | 9,367,183     | 7,591,414           | 81.04           | 53   | 75          |
|                                                                               |           | <b>Total</b>    | 94,560,238    | 76,104,208          |                 |      |             |
|                                                                               |           | <b>Average</b>  | 15,760,039.67 | 12,684,034.67       |                 |      |             |



**Table S2.** Sequencing statistics. small RNA-seq of the response to injury in the mutant background *dcr2* (MiSeq Illumina).

| sRNA-seq of response to injury in mutant background <i>dcr2</i> (MiSeq Illumina) |           |               |           |               |                |              |
|----------------------------------------------------------------------------------|-----------|---------------|-----------|---------------|----------------|--------------|
| Library                                                                          | Condition | Strain        | Raw reads | Trimmed reads | Unique mappers | Multimappers |
| WT_C_R1                                                                          | control   | Wild-type     | 857,521   | 750,254       | 405,619        | 213,920      |
| WT_C_R2                                                                          | control   | Wild-type     | 867,210   | 772,038       | 430,190        | 223,569      |
| WT_C_R3                                                                          | control   | Wild-type     | 510,910   | 485,585       | 252,963        | 161,906      |
| WT_I_R1                                                                          | Injury    | Wild-type     | 932,667   | 891,819       | 567,021        | 168,299      |
| WT_I_R2                                                                          | Injury    | Wild-type     | 818,358   | 766,440       | 492,465        | 139,281      |
| WT_I_R3                                                                          | Injury    | Wild-type     | 877,476   | 813,393       | 410,969        | 248,278      |
| dcr2_C_R1                                                                        | control   | dcr2 knockout | 730,091   | 664,617       | 475,572        | 106,030      |
| dcr2_C_R2                                                                        | control   | dcr2 knockout | 508,989   | 421,307       | 151,193        | 154,898      |
| dcr2_C_R3                                                                        | control   | dcr2 knockout | 640,929   | 595,557       | 337,192        | 133,531      |
| dcr2_I_R1                                                                        | Injury    | dcr2 knockout | 703,656   | 644,254       | 384,010        | 140,316      |
| dcr2_I_R2                                                                        | Injury    | dcr2 knockout | 769,780   | 706,225       | 403,746        | 159,974      |
| dcr2_I_R3                                                                        | Injury    | dcr2 knockout | 740,176   | 636,779       | 302,297        | 161,549      |

**Table S3.** Primers designed for stem-loop RT-PCR and for the construction used to mutate miRNA2.

| <b>Primers for stem-loops</b>                                       |                                                    |            |
|---------------------------------------------------------------------|----------------------------------------------------|------------|
| <b>name</b>                                                         | <b>sequence</b>                                    | <b>nts</b> |
| miR1RT                                                              | GTCGTATCCAGTGCAGGGTCCGAGGTATTCGCACTGGATACGACgcaagt | 50         |
| miR1F                                                               | CGCGtgaacccccggacaa                                | 19         |
| miR2RT                                                              | GTCGTATCCAGTGCAGGGTCCGAGGTATTCGCACTGGATACGACacagat | 50         |
| miR2F                                                               | CGCGtttgcgatgcccaat                                | 21         |
| miR3RT                                                              | GTCGTATCCAGTGCAGGGTCCGAGGTATTCGCACTGGATACGACataccg | 50         |
| miR3F                                                               | CGCGgtggaagctaact                                  | 20         |
| TRNA1RT                                                             | GTCGTATCCAGTGCAGGGTCCGAGGTATTCGCACTGGATACGACTTATCT | 50         |
| TRNA1F                                                              | GCGCGGTTCAAATCCTCCCCTGG                            | 23         |
| S297535RT                                                           | GTCGTATCCAGTGCAGGGTCCGAGGTATTCGCACTGGATACGACTACGCC | 50         |
| S297535F                                                            | GCGCATTACAACCAAGAGTGA                              | 21         |
| URP                                                                 | GTGCAGGGTCCGAGGT                                   | 16         |
|                                                                     |                                                    |            |
|                                                                     |                                                    |            |
| <b>Primers to perform the mutation by replacement of the miRNA2</b> |                                                    |            |
| miRNA F tail                                                        | CCCAGCACTCGTCCGAGGGCAAAGGAATAGACCAAAGGTGAGTCCGAATC | 50         |
| miRNA R tail                                                        | CTCCTTCAATATCAGTTAACGTGATCCTGTCTAATTTGCGAAGCCC     | 48         |
| Fnest                                                               | AGGTACTTATTCCTCATTGGCC                             | 22         |
| Rnest                                                               | GTCCGAAGTATCAGAGCTGC                               | 20         |
|                                                                     |                                                    |            |
|                                                                     |                                                    |            |
|                                                                     |                                                    |            |
